# Supplementary material for: Surface silanol sites in mesoporous MFI zeolites for catalytic Beckmann rearrangement
Source: Royal Society of Chemistry journal article supplement (doi:10.1039/d3cy00543g), 2023-01-01
Supplement: d3cy00543g5.pdf [file d3cy00543g5.pdf]

Supporting Information

**Surface Silanol Sites in Mesoporous MFI Zeolites for Catalytic Beckmann Rearrangement**

Hanyoung Park,<sup>a,b</sup> Jisuk Bang,<sup>a,b</sup> Hongjun Park,<sup>b</sup> Jaeheon Kim,<sup>b</sup> Jeong-Chul Kim,<sup>b</sup> Jeong Young Park<sup>\*,a,b</sup> and Ryong Ryoo<sup>\*,c</sup>

<sup>a</sup> Department of Chemistry, Korea Advanced Institute of Science and Technology (KAIST), Daejeon, 34141, Republic of Korea

<sup>b</sup> Center for Nanomaterials and Chemical Reactions, Institute for Basic Science (IBS), Daejeon, 34141, Republic of Korea

<sup>c</sup> Department of Energy Engineering, Korea Institute of Energy Technology (KENTECH), Naju, Jeonnam 58330, Republic of Korea

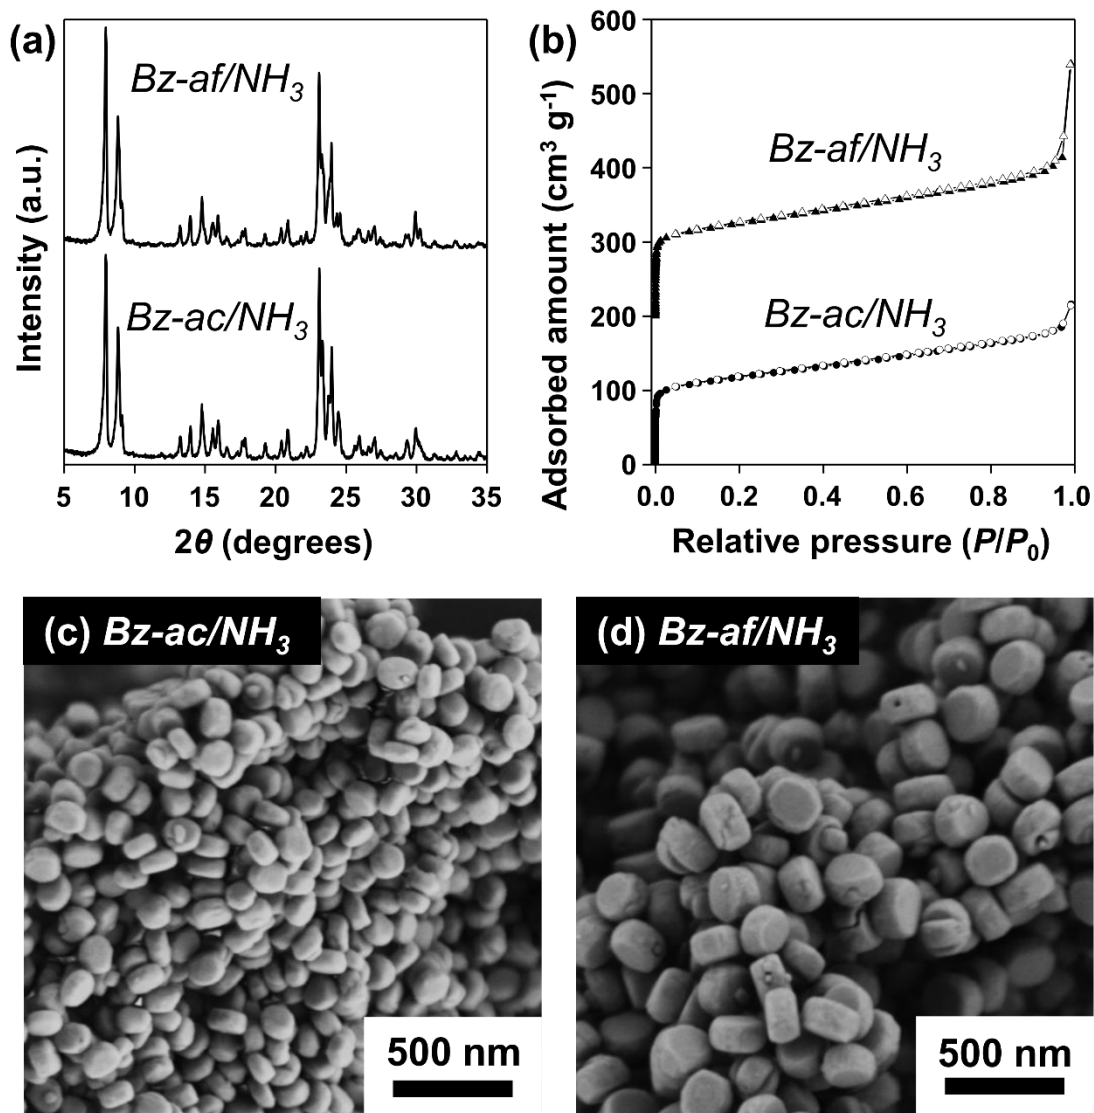

**Fig. S1.** Characterization of *Bz-ac/NH<sub>3</sub>* and *Bz-af/NH<sub>3</sub>* samples: (a) XRD patterns, (b) Ar adsorption isotherms, and SEM images of (c) *Bz-ac/NH<sub>3</sub>* and (d) *Bz-af/NH<sub>3</sub>*. The isotherms were offset vertically by  $200 \text{ cm}^3 \text{g}^{-1}$  STP.

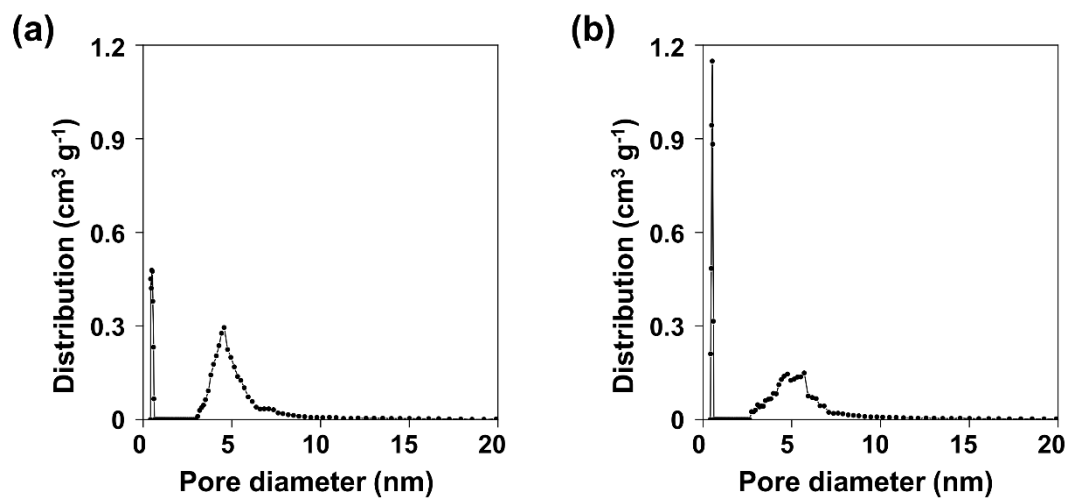

**Fig. S2.** Pore size distributions of (a) *Mz-ac* and (b) *Mz-af*, calculated by non-linear density functional theory method.

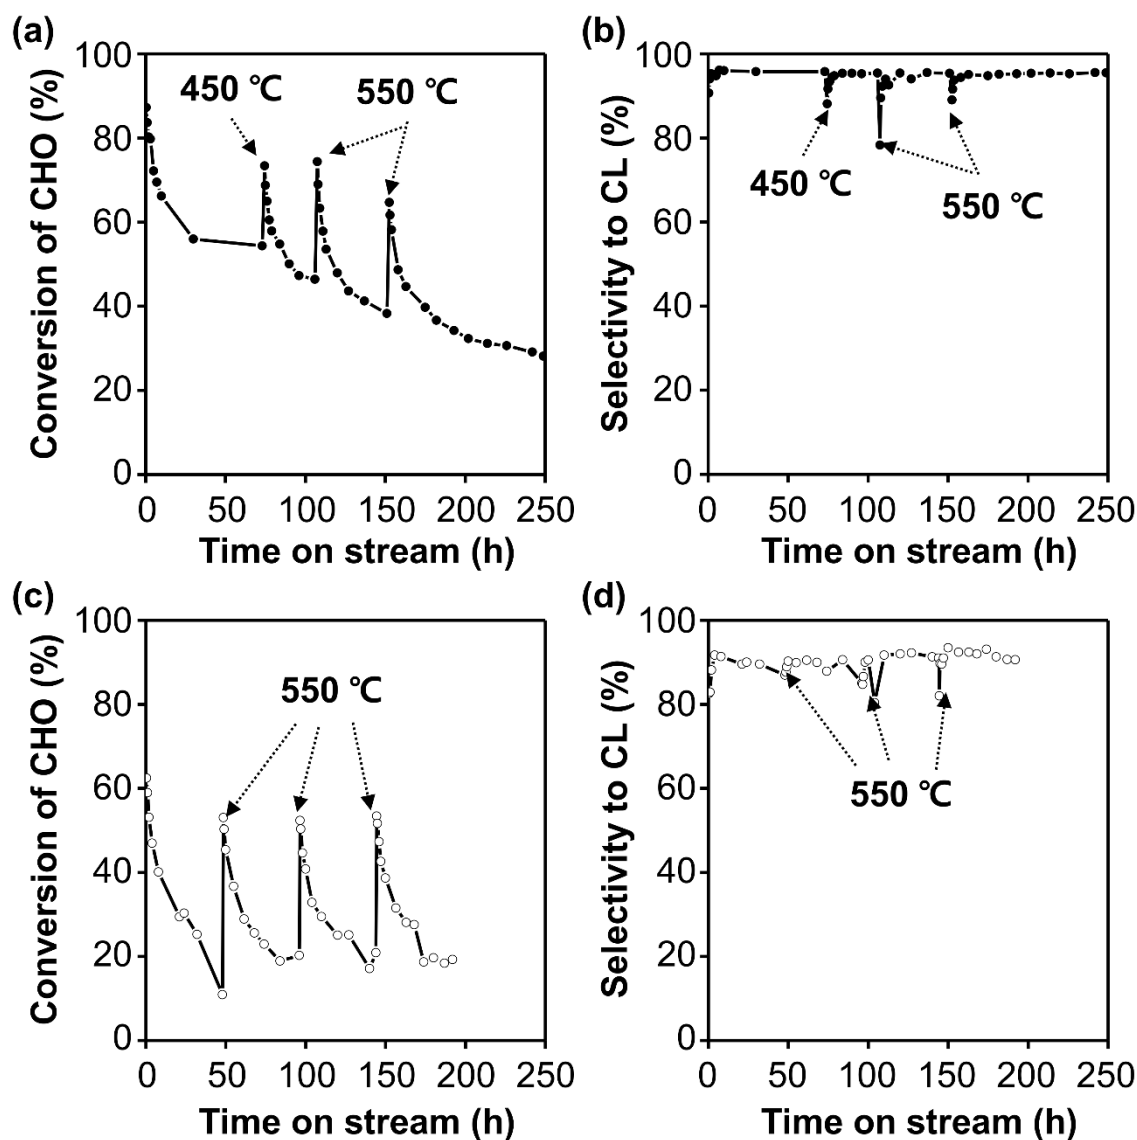

**Fig. S3.** Regeneration of the *Mz-af* and *Bz-af* catalysts in Beckmann rearrangement of cyclohexanone oxime (CHO). (a) Conversion of CHO and (b) selectivity to  $\epsilon$ -caprolactam (CL) over *Mz-af* as a function of the time-on-stream. (c) CHO conversion and (d) CL selectivity over *Bz-af*. Reaction conditions: 0.884 M oxime in ethanol; WHSV = 3.4 h<sup>-1</sup>; temp = 350 °C; N<sub>2</sub> flow rate = 15 cm<sup>3</sup> min<sup>-1</sup>. The catalysts were heated in an air flow (flow rate: 50 cm<sup>3</sup> min<sup>-1</sup>) for their regeneration at the denoted temperatures, and then cooled down to the reaction temperature.
