# Supplementary figures and images for: Surface silanol sites in mesoporous MFI zeolites for catalytic Beckmann rearrangement
Source: Royal Society of Chemistry journal article supplement (doi:10.1039/d3cy00543g), 2023-01-01

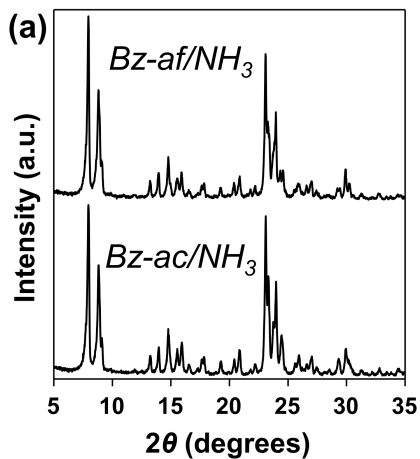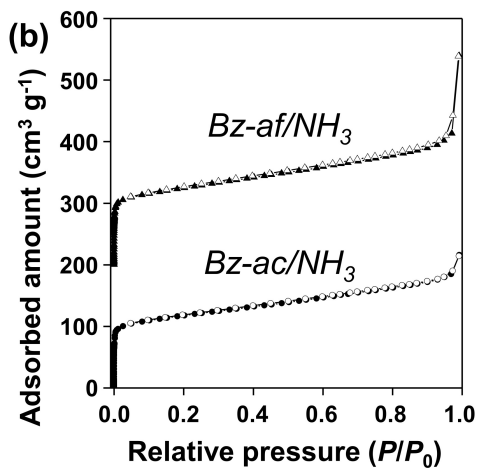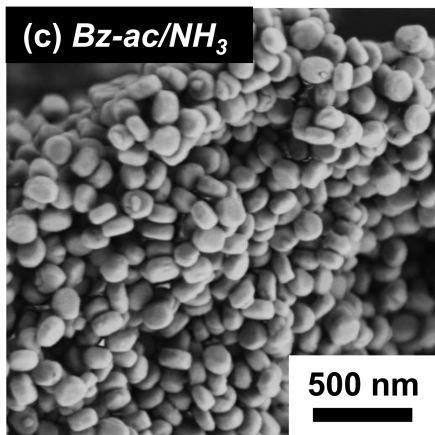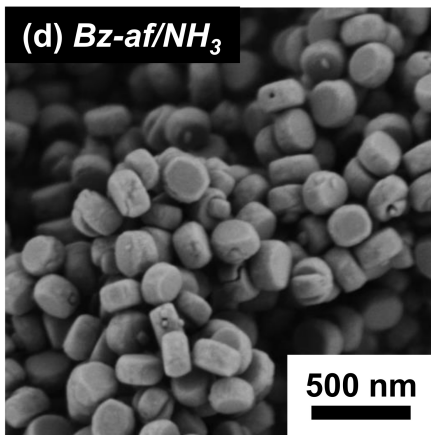

Supplement: d3cy00543g2.pdf [file d3cy00543g2.pdf]

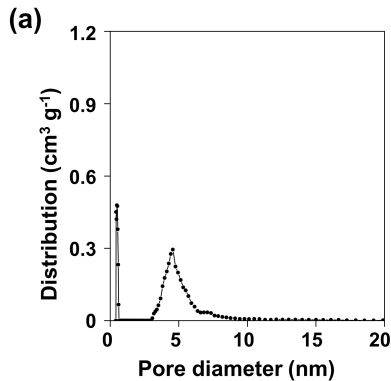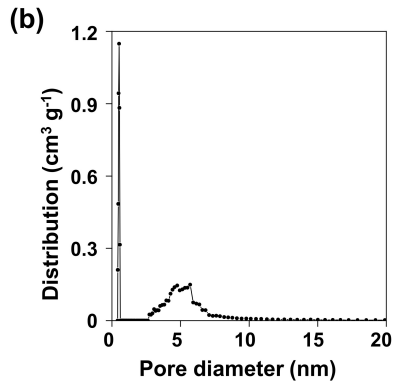

Supplement: d3cy00543g3.pdf [file d3cy00543g3.pdf]
